# Supplementary material for: Facile synthesis and enhanced microwave absorption properties of anthracite-based carbon/Ni3Fe/NiO ternary composites
Source: Royal Society of Chemistry journal article supplement (doi:10.1039/d0nj02769c), 2020-01-01
Supplement: d0nj02769c1.pdf [file d0nj02769c1.pdf]

## Supporting Information

### Facile synthesis and enhanced microwave absorption properties of anthracite-based carbon/Ni<sub>3</sub>Fe/NiO ternary composites

Hengdong Ren<sup>a</sup>, Jialin Ma<sup>a</sup>, Jun Zhou<sup>a</sup>, Xiangfeng Shu<sup>a</sup>, Zhenying Liu<sup>a</sup>, Yin Liu<sup>\*a, b</sup>,

Yan Zhao<sup>a</sup>, Tao Ge<sup>a</sup>, Fanfei Min<sup>a</sup>, Ling Bing Kong<sup>c</sup>

- a. School of Materials Science and Engineering, Anhui University of Science and Technology, Huainan 232001, Anhui, China
- b. State Key Laboratory of Mining Response and Disaster Prevention and Control in Deep Coal Mines, Anhui University of Science and Technology, Huainan 232001, Anhui, China
- c. College of New Materials and New Energies, Shenzhen Technology University, Shenzhen 518118, Guangdong, China

---

#### Corresponding author

mail addresses: yinliu@aust.edu.cn (Yin Liu)

## 2 Results and discussion

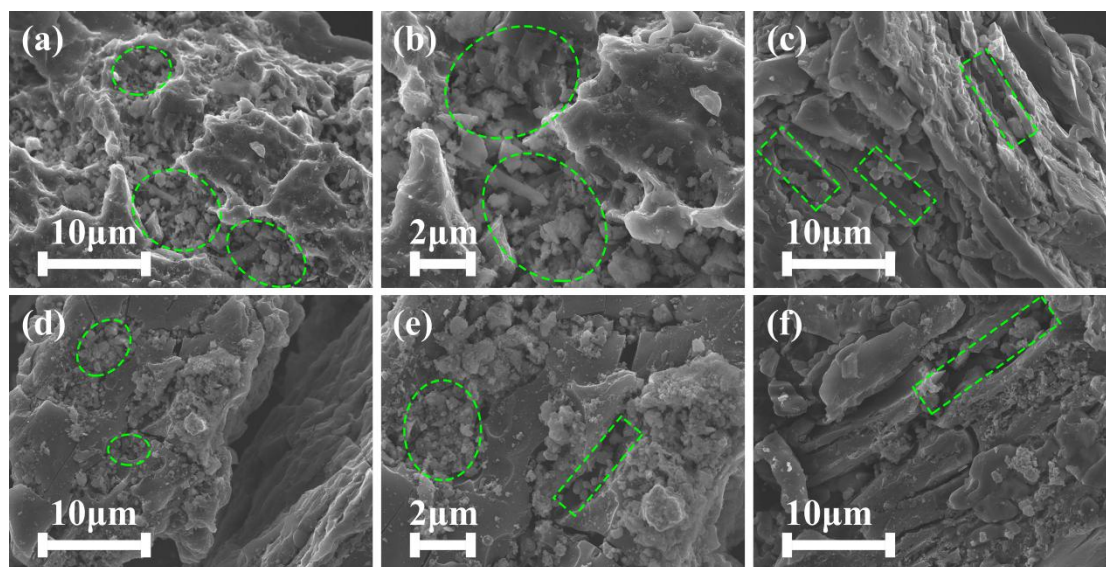

**Fig. S1.** SEM images of AFN-1 (a-c) and AFN-3 (d-f).

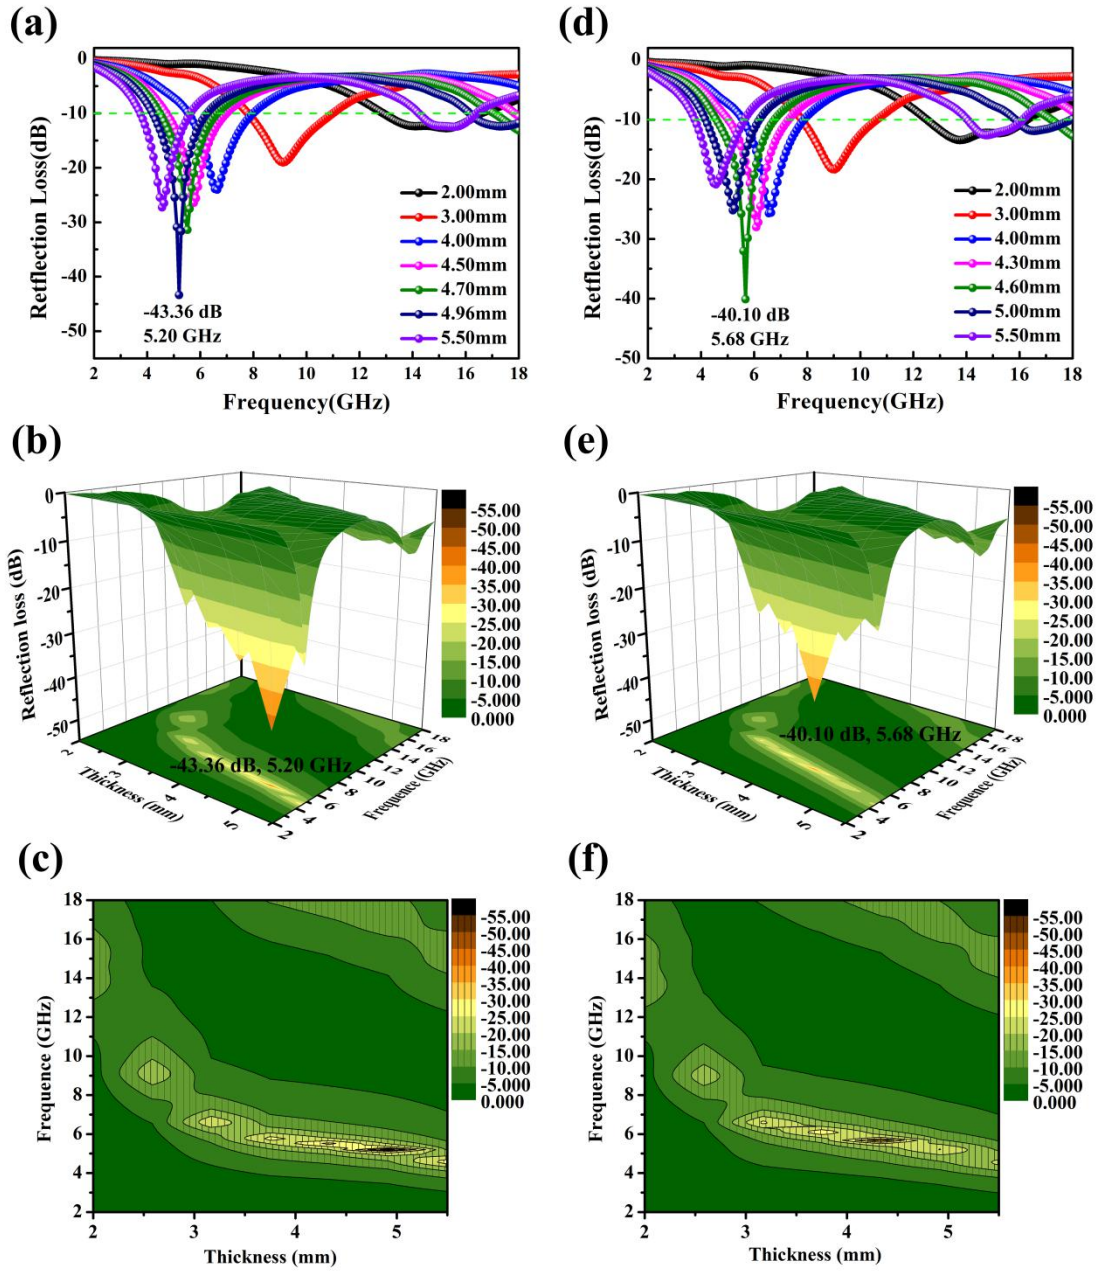

**Fig. S2.** The RL curves, three-dimensional RL and contour maps of AFN-1 (a-c) and AFN-3 (d-f).

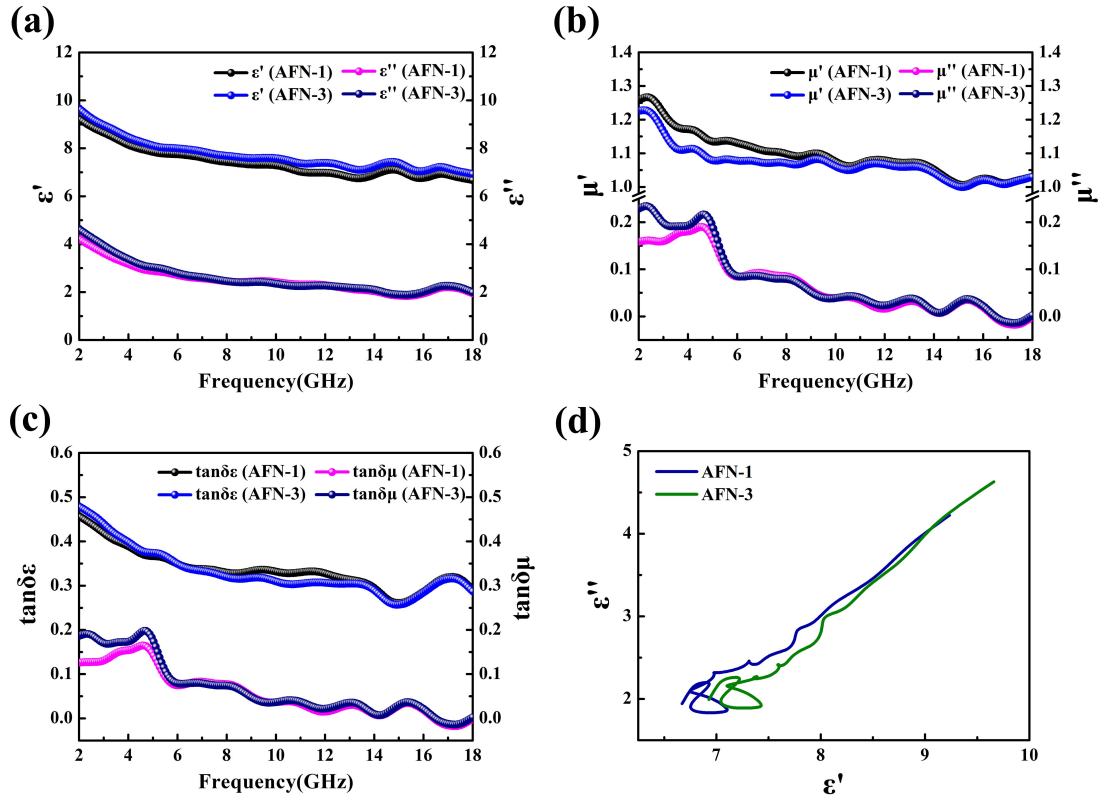

**Fig. S3.** The complex permittivity (a), complex permeability (b), dielectric loss and magnetic loss tangent curves (c) and Cole-Cole semicircle of AFN-1 and AFN-2.

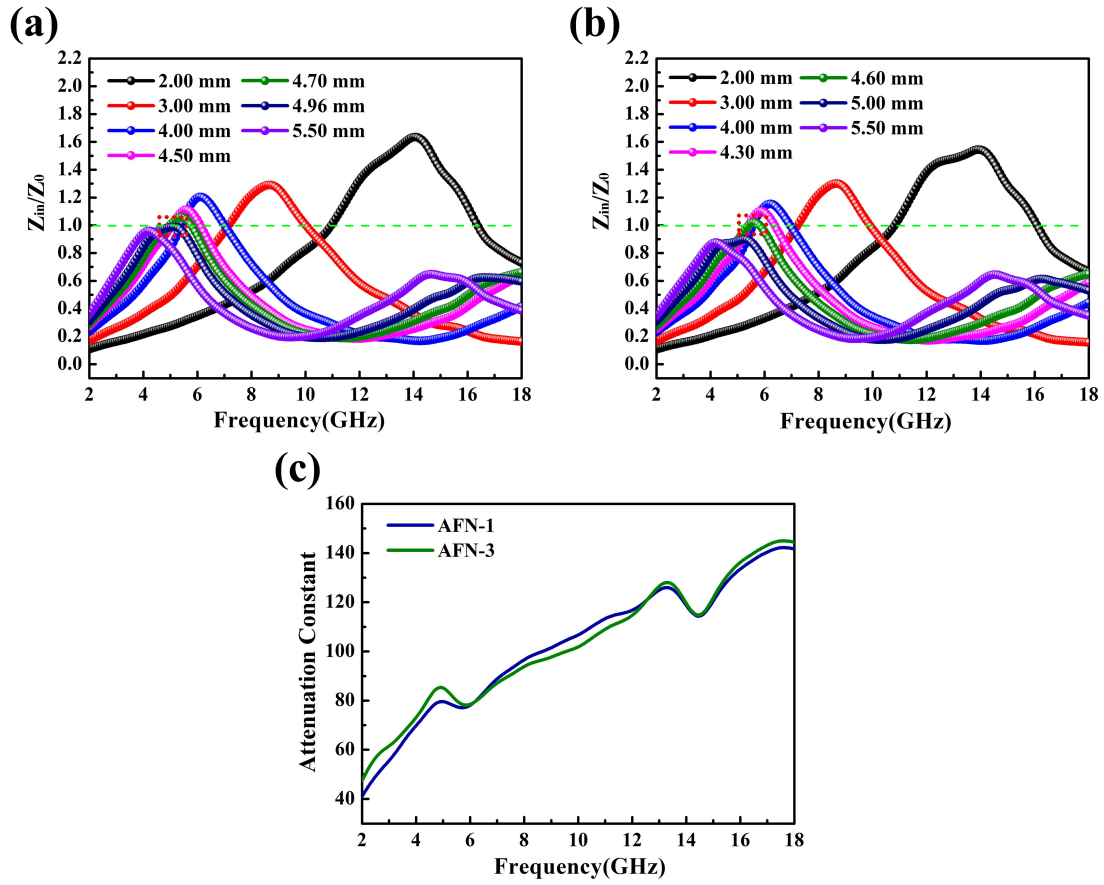

**Fig. S4.** The impedance matching curves of AFN-1 (a) and AFN-3 (b) , and their attenuation constant (c).
